# Supplementary material
Source: PubMed Central journal article supplement (PMC11572543)
Supplement: NIHMS2031177-supplement-Supp_Tables.pdf [file NIHMS2031177-supplement-Supp_Tables.pdf]

**Quality Diet Indexes and Risk of Hepatocellular Carcinoma:  
Findings from the Singapore Chinese Health Study**

Hung N. Luu, Nithya Neelakantan, Ting-ting Geng, Renwei Wang,  
George Goh Boon Bee, Jose C. Clemente, Aizhen Jin, Rob M van Dam,  
Wei Jia, Jaideep Behari, Woon-Puay Koh, Jian-Min Yuan

**Table of Contents**

|                                                                                                                                                                                                                                                  | Page |
|--------------------------------------------------------------------------------------------------------------------------------------------------------------------------------------------------------------------------------------------------|------|
| Supplementary Table 1: Dietary components and scoring standards of AHEI-2010, aMED, DASH and HDI scores in the Singapore Chinese Health Study                                                                                                    | 2    |
| Supplementary Table 2. Association Between the Diet Quality Indexes and Risk of Hepatocellular Carcinoma in the Singapore Chinese Health Study, Stratified Analysis by BMI and History of Diabetes                                               | 4    |
| Supplementary Table 3. Associations Between the Diet Quality Indices and Risk of Hepatocellular Carcinoma in the Singapore Chinese Health Study, After Excluding Incident Cases and Person-Years Observed in the First Two Years Post-Enrollment | 6    |

**Supplementary Table 1: Dietary components and scoring standards of AHEI-2010, aMED, DASH and HDI scores in the Singapore Chinese Health Study<sup>1</sup>**

| Index component                                    | Diet quality indices, scoring standards             |                                |                                              |                                                     |
|----------------------------------------------------|-----------------------------------------------------|--------------------------------|----------------------------------------------|-----------------------------------------------------|
|                                                    | AHEI-2010                                           | aMED                           | DASH                                         | HDI                                                 |
| Index component                                    | 9 components;<br>10 points each;<br>90 total points | 8 components;<br>1 point each; | 8 components;<br>5 points each;<br>40 points | 7 components;<br>10 points each;<br>70 total points |
| Vegetables <sup>2</sup>                            | ≥5 <i>servings/d</i>                                | ≥ Median intake                | Highest quintile                             | Fruit and vegetables: >400 g/d                      |
| Fruit <sup>3</sup>                                 | ≥4 <i>servings/d</i>                                | ≥ Median intake                | Highest quintile                             | -                                                   |
| Whole grains                                       | Men: 90 g/d, Women: 75 g/d                          | ≥ Median intake                | Highest quintile                             | -                                                   |
| Nuts <sup>4</sup>                                  | N/A                                                 | ≥ Median intake                | Nuts and legumes:                            | -                                                   |
| Legumes <sup>4</sup>                               | Nuts and legumes: ≥1 <i>servings/d</i>              | ≥ Median intake                | highest quintile                             | -                                                   |
| Dairy                                              | -                                                   | -                              | Highest quintile                             | -                                                   |
| Fish                                               | -                                                   | ≥ Median intake                | -                                            | -                                                   |
| Alcohol <sup>5</sup>                               | Not included                                        | -                              | -                                            | -                                                   |
| Dietary fiber                                      | -                                                   | -                              | -                                            | >25 g/d                                             |
| Oils/fats                                          | Long chain n-3 PUFAs: 250 mg/d                      | > Median                       | -                                            | SFAs, <sup>7,8</sup> % of energy: <10%              |
| Long-chain n-3 FA (mean±SD)                        | PUFAs, % of energy: ≥10%                            | (MUFA: SFA ratio)<br>0.50±0.50 | -                                            | PUFAs, <sup>7</sup> % of energy: 6-10%              |
| MUFA (mean±SD)                                     | -                                                   | -                              | -                                            | -                                                   |
| PUFA (mean±SD)                                     | 5.05±1.83                                           | -                              | 7.62±2.15                                    | -                                                   |
| SFA (mean±SD)                                      | -                                                   | -                              | -                                            | 8.85±2.24                                           |
| Trans fat (mean±SD)                                | Not included                                        | -                              | -                                            | -                                                   |
| Protein, <sup>7</sup> % of energy                  | -                                                   | -                              | -                                            | 10-15%                                              |
| Mono-and disaccharides, <sup>7,8</sup> % of energy | -                                                   | -                              | -                                            | <10%                                                |
| Cholesterol <sup>8</sup>                           | -                                                   | -                              | -                                            | <300 mg/d                                           |
| Red meat (fresh/preserved) <sup>8</sup>            | 0 <i>servings/d</i>                                 | < Median intake                | Lowest quintile                              | -                                                   |
| SSBs and fruit juice <sup>8</sup>                  | 0 <i>servings/d</i>                                 | -                              | Lowest quintile                              | -                                                   |
| Sodium <sup>8</sup>                                | Lowest decile                                       | -                              | Lowest quintile                              | -                                                   |

<sup>1</sup> AHEI-2010, Alternative Healthy Eating Index-2010; aMED, alternate Mediterranean diet; DASH, Dietary Approaches to Stop Hypertension; HDI, Healthy Diet Indicator; MUFA, monounsaturated fatty acid; PUFA, polyunsaturated fatty acid; SFA, saturated fatty acid; SSB, sugar sweetened beverages.

<sup>2</sup> Excluded potatoes and preserved vegetables; One serving of vegetable is 67 g (0.5 cup of typical local vegetables).

<sup>3</sup> Excluded preserved fruits; One serving is 1 medium piece of fruit.

<sup>4</sup> One serving = 28 g of nuts or 1 tablespoon (16 g) of peanut butter or 1 medium size tofu item. In the AHEI-2010 score modified for East Asian populations, we used nuts only instead of the combination of legumes and nuts.

<sup>5</sup> One serving of alcohol = 10 g. In the AHEI-2010 score modified for East Asian populations, we defined optimal intake of alcohol as less than 1 serving per day for both men and women (i.e., 10 points) and fewer points for higher intakes (minimum score 0 was given to heavy intake i.e.,  $\geq 3.5$  servings/d for men and  $\geq 2.5$  servings/d for women).

<sup>6</sup> Due to lack of information on *trans* Fat intake in SCHS cohort, it was not included as a component of the AHEI-2010 score. Hence, the total AHEI-2010 score ranged from 0 to 100 in our study.

<sup>7</sup> Excluded energy provided by alcohol.

<sup>8</sup> Components were reverse-scored; Higher scores were assigned for lower intakes. For aHEI-2010: One serving = 1 glass, packet, or typical local portion of sugar-sweetened beverage or fruit juice

**Supplementary Table 2. Association Between the Diet Quality Indexes and Risk of Hepatocellular Carcinoma in the Singapore Chinese Health Study, Stratified Analysis by BMI and History of Diabetes**

| DQI                                | BMI<25 kg/m <sup>2</sup> <sup>a</sup> |                          | BMI≥25 kg/m <sup>2</sup> <sup>a</sup> |                          | No History of Diabetes <sup>b</sup> |                          | Diabetes History <sup>b</sup> |                          |
|------------------------------------|---------------------------------------|--------------------------|---------------------------------------|--------------------------|-------------------------------------|--------------------------|-------------------------------|--------------------------|
|                                    | Cases                                 | HR (95% CI) <sup>a</sup> | Cases                                 | HR (95% CI) <sup>a</sup> | Cases                               | HR (95% CI) <sup>a</sup> | Cases                         | HR (95% CI) <sup>a</sup> |
| <b>AHEI-2010</b>                   |                                       |                          |                                       |                          |                                     |                          |                               |                          |
| Quartile 1 (17.0-42.1) (lowest)    | 116                                   | 1.00                     | 52                                    | 1.00                     | 144                                 | 1.00                     | 24                            | 1.00                     |
| Quartile 2 (42.1-46.7)             | 100                                   | 0.94 (0.71-1.22)         | 44                                    | 0.86 (0.57-1.28)         | 122                                 | 0.93 (0.73-1.18)         | 22                            | 0.82 (0.46-1.47)         |
| Quartile 3 (46.7-51.5)             | 101                                   | 1.02 (0.78-1.34)         | 48                                    | 0.91 (0.61-1.35)         | 128                                 | 1.04 (0.82-1.33)         | 21                            | 0.72 (0.40-1.29)         |
| Quartile 4 (51.5-75.9) (highest)   | 64                                    | <b>0.69 (0.50-0.95)</b>  | 36                                    | 0.65 (0.42-1.01)         | 82                                  | <b>0.71 (0.53-0.94)</b>  | 18                            | 0.59 (0.31-1.11)         |
| <i>P</i> <sub>trend</sub>          |                                       | 0.07                     |                                       | 0.09                     |                                     | 0.07                     |                               | 0.09                     |
| <i>P</i> <sub>interaction</sub>    |                                       | 0.97                     |                                       |                          |                                     | 0.31                     |                               |                          |
| Continuous scale (per SD increase) |                                       | <b>0.91 (0.81-1.00)</b>  |                                       | 0.87 (0.75-1.01)         |                                     | 0.92 (0.84-1.01)         |                               | 0.81 (0.65-1.01)         |
| <b>aMED</b>                        |                                       |                          |                                       |                          |                                     |                          |                               |                          |
| Quartile 1 (0-2.0) (lowest)        | 106                                   | 1.00                     | 38                                    | 1.00                     | 126                                 | 1.00                     | 18                            | 1.00                     |
| Quartile 2 (3.0)                   | 76                                    | 0.82 (0.61-1.10)         | 33                                    | 0.92 (0.58-1.48)         | 94                                  | 0.85 (0.65-1.12)         | 15                            | 0.83 (0.42-1.65)         |
| Quartile 3 (4.0-5.0)               | 162                                   | 0.93 (0.72-1.21)         | 64                                    | 0.80 (0.53-1.21)         | 186                                 | 0.88 (0.69-1.11)         | 40                            | 1.10 (0.62-1.96)         |
| Quartile 4 (6.0-8.0) (highest)     | 37                                    | <b>0.46 (0.31-0.69)</b>  | 45                                    | 1.21 (0.75-1.94)         | 70                                  | <b>0.71 (0.52-0.98)</b>  | 12                            | 0.67 (0.31-1.48)         |
| <i>P</i> <sub>trend</sub>          |                                       | <b>0.007</b>             |                                       | 0.71                     |                                     | 0.07                     |                               | 0.06                     |
| <i>P</i> <sub>interaction</sub>    |                                       | 0.07                     |                                       |                          |                                     | 0.06                     |                               |                          |
| Continuous scale (per SD increase) |                                       | <b>0.85 (0.76-0.96)</b>  |                                       | 0.99 (0.84-1.16)         |                                     | <b>0.90 (0.81-0.99)</b>  |                               | 0.94 (0.74-1.20)         |
| <b>DASH</b>                        |                                       |                          |                                       |                          |                                     |                          |                               |                          |
| Quartile 1 (8.0-21.0) (lowest)     | 140                                   | 1.00                     | 52                                    | 1.00                     | 170                                 | 1.00                     | 22                            | 1.00                     |
| Quartile 2 (22.0-23.0)             | 77                                    | 0.91 (0.69-1.21)         | 31                                    | 0.88 (0.56-1.38)         | 85                                  | 0.85 (0.65-1.10)         | 23                            | 1.33 (0.74-2.40)         |
| Quartile 3 (24.0-27.0)             | 108                                   | 0.75 (0.58-0.97)         | 69                                    | 1.12 (0.77-1.62)         | 146                                 | 0.85 (0.67-1.06)         | 31                            | 0.99 (0.56-1.72)         |
| Quartile 4 (28.0-39.0) (highest)   | 56                                    | <b>0.64 (0.46-0.88)</b>  | 28                                    | 0.74 (0.46-1.19)         | 75                                  | <b>0.73 (0.55-0.97)</b>  | 9                             | <b>0.40 (0.18-0.88)</b>  |
| <i>P</i> <sub>trend</sub>          |                                       | <b>0.002</b>             |                                       | 0.54                     |                                     | <b>0.03</b>              |                               | <b>0.03</b>              |
| <i>P</i> <sub>interaction</sub>    |                                       | 0.10                     |                                       |                          |                                     | 0.15                     |                               |                          |
| Continuous scale (per SD increase) |                                       | <b>0.83 (0.75-0.93)</b>  |                                       | 0.94 (0.80-1.09)         |                                     | <b>0.89 (0.81-0.98)</b>  |                               | <b>0.75 (0.59-0.94)</b>  |
| <b>HDI</b>                         |                                       |                          |                                       |                          |                                     |                          |                               |                          |
| Quartile 1 (14.2-45.2) (lowest)    | 96                                    | 1.00                     | 54                                    | 1.00                     | 137                                 | 1.00                     | 13                            | 1.00                     |
| Quartile 2 (45.2-50.2)             | 116                                   | 1.23 (0.94-1.62)         | 43                                    | 0.76 (0.51-1.14)         | 133                                 | 0.98 (0.77-1.24)         | 26                            | 1.90 (0.97-3.71)         |
| Quartile 3 (50.2-55.1)             | 84                                    | 0.86 (0.64-1.16)         | 37                                    | 0.67 (0.44-1.02)         | 97                                  | <b>0.69 (0.53-0.90)</b>  | 24                            | 1.80 (0.91-3.56)         |
| Quartile 4 (55.1-70.0) (highest)   | 85                                    | 0.91 (0.67-1.24)         | 46                                    | 0.74 (0.49-1.10)         | 109                                 | <b>0.75 (0.58-0.98)</b>  | 22                            | 1.92 (0.94-3.90)         |
| <i>P</i> <sub>trend</sub>          |                                       | 0.18                     |                                       | 0.11                     |                                     | <b>0.005</b>             |                               | 0.11                     |

|                                    |  |                  |                  |                         |                  |
|------------------------------------|--|------------------|------------------|-------------------------|------------------|
| <i>P<sub>interaction</sub></i>     |  | 0.76             |                  | <b>0.03</b>             |                  |
| Continuous scale (per SD increase) |  | 0.94 (0.85-1.05) | 0.87 (0.75-1.01) | <b>0.89 (0.82-0.98)</b> | 1.09 (0.87-1.37) |

Abbreviations: AHEI-2010, Alternative Healthy Eating Index-2010; aMED, alternate Mediterranean diet; DASH, Dietary Approaches to Stop Hypertension; DQI, Diet Quality Index; HDI, Healthy Diet Indicator

<sup>a</sup>Models adjusted for age, sex, dialect, year of enrollment, education level, smoking status, coffee drinking status, alcohol drinking status, total energy intake, diabetes.

<sup>a</sup>Models adjusted for age, sex, dialect, year of enrollment, education level, smoking status, coffee drinking status, alcohol drinking status, total energy intake, BMI,

**Supplementary Table 3. Associations Between the Diet Quality Indices and Risk of Hepatocellular Carcinoma in the Singapore Chinese Health Study, After Excluding Incident Cases and Person-Years Observed in the First Two Years Post-Enrollment**

| Dietary Quality Index (DQI)        | Person-year | Cases | HR (95% CI) <sup>a</sup> |
|------------------------------------|-------------|-------|--------------------------|
| <b>AHEI-2010</b>                   |             |       |                          |
| Quartile 1 (17.0-42.1) (lowest)    | 231,448     | 156   | <b>1.00</b>              |
| Quartile 2 (42.1-46.7)             | 239,055     | 127   | 0.85 (0.67-1.07)         |
| Quartile 3 (46.7-51.5)             | 242,295     | 141   | 0.99 (0.78-1.24)         |
| Quartile 4 (51.5-75.9) (highest)   | 248,992     | 96    | <b>0.70 (0.54-0.91)</b>  |
| <i>P<sub>trend</sub></i>           |             |       | <b>0.04</b>              |
| Continuous scale (per SD increase) |             |       | <b>0.89 (0.82-0.98)</b>  |
| <b>aMED</b>                        |             |       |                          |
| Quartile 1 (0-2.0) (lowest)        | 192,334     | 132   | 1.00                     |
| Quartile 2 (3.0)                   | 185,134     | 103   | 0.87 (0.67-1.12)         |
| Quartile 3 (4.0-5.0)               | 387,452     | 209   | 0.88 (0.70-1.10)         |
| Quartile 4 (6.0-8.0) (highest)     | 196,869     | 76    | <b>0.68 (0.50-0.92)</b>  |
| <i>P<sub>trend</sub></i>           |             |       | <b>0.03</b>              |
| Continuous scale (per SD increase) |             |       | <b>0.89 (0.81-0.98)</b>  |
| <b>DASH</b>                        |             |       |                          |
| Quartile 1 (8.0-21.0) (lowest)     | 262,257     | 173   | 1.00                     |
| Quartile 2 (22.0-23.0)             | 170,898     | 100   | 0.90 (0.70-1.15)         |
| Quartile 3 (24.0-27.0)             | 316,266     | 161   | 0.84 (0.67-1.04)         |
| Quartile 4 (28.0-39.0) (highest)   | 212,369     | 81    | <b>0.69 (0.53-0.91)</b>  |
| <i>P<sub>trend</sub></i>           |             |       | <b>0.008</b>             |
| Continuous scale (per SD increase) |             |       | <b>0.87 (0.80-0.96)</b>  |
| <b>HDI</b>                         |             |       |                          |
| Quartile 1 (14.2-45.2) (lowest)    | 233,575     | 142   | 1.00                     |
| Quartile 2 (45.2-50.2)             | 239,874     | 148   | 1.03 (0.81-1.29)         |
| Quartile 3 (50.2-55.1)             | 241,773     | 113   | <b>0.77 (0.60-0.98)</b>  |
| Quartile 4 (55.1-70.0) (highest)   | 246,567     | 117   | 0.78 (0.61-1.01)         |
| <i>P<sub>trend</sub></i>           |             |       | <b>0.01</b>              |
| Continuous scale (per SD increase) |             |       | <b>0.90 (0.82-0.98)</b>  |

Abbreviations: AHEI-2010, Alternative Healthy Eating Index-2010; aMED, alternate Mediterranean diet; DASH, Dietary Approaches to Stop Hypertension; DQI, Diet Quality Index; HDI, Healthy Diet Indicator  
<sup>a</sup>Models adjusted for age, sex, dialect, year of enrollment, education level, smoking status, coffee drinking status, alcohol drinking status, total energy intake, BMI, diabetes status.
